# Supplementary material for: Analysis of Single Nucleotide Polymorphisms Identifies Major Type 1A Diabetes Locus Telomeric of the Major Histocompatibility Complex
Source: Oxford University Press journal article supplement (doi:10.2337/db07-0900), 2007-12-08
Supplement: db070900onlineonlytable1.xls [file db070900onlineonlytable1.xls]

## Sheet: Table 1
Illumina 2, All Chromosomes
SNP	Bld 35 Position (Mb)	p-value	OR	95% CI LL	95% CI UL	Allele 1 case	Allele 2 case	Allele 1 ctrl	Allele 2 ctrl
rs2480006	23.0027	0.54792	1.1	0.82	1.48	208	105	330	183
rs4712728	23.0502	0.329155	1.16	0.86	1.55	114	195	177	351
rs2064364	23.1659	0.7236	1.07	0.76	1.52	258	60	445	111
rs10946594	23.2847	0.824079	1.04	0.78	1.39	127	172	207	292
rs7740800	23.3458	0.713045	1.06	0.79	1.41	120	192	197	334
rs4326228	23.3865	0.745704	1.06	0.77	1.46	82	241	135	421
rs2147858	23.4531	0.648911	1.08	0.8	1.45	201	101	340	184
rs6932335	23.5093	0.50439	1.11	0.83	1.49	121	185	193	328
rs2022329	23.5427	0.156921	1.28	0.92	1.79	250	65	415	138
rs2206334	23.6244	0.064724	1.33	0.99	1.78	192	113	279	218
rs1321905	23.7373	0.632857	1.09	0.8	1.49	221	85	362	152
rs2057353	23.7958	0.651171	1.07	0.8	1.44	107	206	175	361
rs12665727	23.9786	0.826317	1.06	0.69	1.62	38	295	62	509
rs481372	24.0338	0.240036	1.29	0.86	1.95	45	295	61	516
rs490431	24.098	0.438296	1.17	0.8	1.73	283	45	477	89
rs7761213	24.1364	0.224717	1.23	0.89	1.7	232	74	384	151
rs6927375	24.1893	0.039557	1.36	1.02	1.81	143	163	196	304
rs7762605	24.3037	0.116116	1.29	0.94	1.76	239	79	378	161
rs2328208	24.3936	1	1.01	0.72	1.43	64	260	108	443
rs1535331	24.4506	0.454627	1.23	0.74	2.03	305	24	529	51
rs3761788	24.5234	1	1.02	0.59	1.75	22	312	38	548
rs2793434	24.5687	0.884922	1.02	0.77	1.36	135	172	226	294
rs1126617	24.5976	0.12569	1.27	0.94	1.73	211	90	341	185
rs2817239	24.6493	0.563413	1.09	0.82	1.45	164	138	273	250
rs807534	24.6596	0.398918	1.22	0.8	1.86	293	36	495	74
rs807541	24.6673	0.43116	1.17	0.83	1.66	256	60	427	117
rs4576240	24.7045	0.802646	1.09	0.67	1.8	305	26	525	49
rs2294689	24.7613	0.251902	1.48	0.81	2.68	320	16	541	40
rs3756819	24.7733	0.118822	1.42	0.93	2.18	297	34	491	80
rs1053598	24.8125	1	1.01	0.73	1.4	231	79	384	133
rs6904263	24.8794	0.713226	1.08	0.75	1.56	277	54	469	99
rs1923185	24.8889	0.013775	2.58	1.18	5.64	328	8	540	34
rs9366585	24.9493	0.250426	1.19	0.89	1.57	168	140	263	260
rs2817719	25.0039	0.318151	1.17	0.87	1.58	105	203	162	366
rs127489	25.0755	0.123538	1.35	0.93	1.94	264	51	423	110
rs1562423	25.1527	0.735455	1.06	0.76	1.48	258	70	413	119
rs302969	25.2362	0.350047	1.18	0.85	1.65	76	237	117	432
rs9295648	25.2945	0.362372	1.15	0.85	1.55	109	201	168	356
rs769108	25.3537	0.764431	1.05	0.78	1.41	117	176	198	312
rs2690107	25.4385	0.278462	1.19	0.88	1.61	102	211	155	382
rs1209305	25.4872	0.200968	1.34	0.87	2.07	297	33	498	74
rs1927693	25.5228	0.17909	1.23	0.92	1.65	210	105	312	192
rs913455	25.5283	0.016345	1.73	1.12	2.67	45	291	47	526
rs399930	25.5776	0.163862	1.24	0.93	1.65	172	128	260	240
rs368638	25.6566	0.549856	1.1	0.82	1.47	176	114	297	211
rs1883258	25.7581	0.938426	1.02	0.75	1.38	98	202	170	358
rs9461204	25.8264	0.039309	1.4	1.02	1.93	89	229	118	425
rs2275906	25.8818	0.753214	1.08	0.71	1.63	300	39	507	71
rs11754288	25.8849	0.161626	1.23	0.93	1.65	127	188	186	340
rs2328894	25.8862	0.277803	2.13	0.59	7.71	340	3	584	11
rs1165196	25.9211	0.239683	1.2	0.9	1.6	129	186	190	328
rs942379	25.9576	0.277818	1.17	0.88	1.56	136	181	205	320
rs1165165	25.9704	0.253123	1.21	0.88	1.66	85	230	131	429
rs9467632	25.9977	0.018494	1.58	1.09	2.29	60	271	71	506
rs1865760	26.025	0.132506	1.27	0.94	1.71	212	100	318	190
rs2009610	26.075	0.717024	1.08	0.75	1.54	265	57	440	102
rs10425	26.1645	0.695372	1.07	0.79	1.46	93	218	155	390
rs1800562	26.2011	0.594403	1.26	0.61	2.62	327	11	564	24
rs198844	26.2163	1	1	0.75	1.32	151	151	260	259
rs198833	26.2225	0.173525	1.36	0.89	2.08	297	34	502	78
rs4496782	26.2926	0.269208	1.24	0.86	1.79	279	50	459	102
rs2050950	26.3429	0.447926	1.19	0.77	1.84	300	34	503	68
rs2393592	26.3935	0.044571	1.34	1.01	1.78	172	141	244	269
rs2393593	26.3937	0.020653	1.4	1.06	1.86	159	148	222	290
rs9461245	26.4626	0.264675	1.38	0.83	2.29	303	23	516	54
rs2072802	26.5009	0.621961	1.5	0.53	4.25	337	5	583	13
rs4712990	26.5217	0.211933	1.44	0.86	2.4	303	22	518	54
rs7745238	26.5313	0.093136	1.46	0.95	2.25	284	33	466	79
rs2893848	26.539	0.219162	1.31	0.86	1.98	286	37	479	81
rs2237236	26.5595	0.10261	1.26	0.96	1.67	157	160	234	301
rs3736781	26.6133	0.165102	1.24	0.93	1.65	188	115	304	230
rs4871	26.6536	0.189037	1.21	0.91	1.62	190	115	306	225
rs3800303	26.7062	0.823108	1.04	0.78	1.39	200	109	339	192
rs9295702	26.742	0.010133	1.5	1.11	2.03	108	217	138	416
rs12204142	26.8099	0.123299	1.4	0.92	2.12	285	36	454	80
rs4358615	27.1065	0.06048	1.31	0.99	1.74	146	165	211	313
rs12661756	27.1115	0.043281	1.34	1.01	1.78	146	165	210	318
rs10946899	27.1317	0.002649	1.61	1.19	2.18	107	212	130	414
rs994691	27.1557	1	1.01	0.76	1.34	171	139	287	235
rs6930508	27.1611	0.257435	1.18	0.89	1.56	166	149	263	278
rs7451149	27.1655	0.158556	1.22	0.93	1.61	170	148	263	280
rs6456768	27.2018	0.88516	1.03	0.77	1.36	135	177	223	300
rs4713069	27.2363	0.469991	1.11	0.84	1.48	167	141	260	244
rs858968	27.2613	0.001266	2.02	1.31	3.11	292	31	430	92
rs996247	27.3011	8.5e-05	2.08	1.43	3.02	279	44	408	134
rs4236043	27.3122	0.000175	2	1.38	2.9	278	45	407	132
rs9393795	27.3257	0.164198	1.24	0.93	1.64	133	179	196	326
rs6915678	27.3438	0.193454	1.21	0.91	1.6	141	172	211	311
rs9379968	27.3526	0.1891	1.21	0.91	1.62	153	148	229	269
rs9379971	27.3673	0.08903	1.29	0.97	1.72	129	183	183	335
rs7771953	27.3793	0.715168	1.07	0.8	1.42	143	158	232	273
rs2235233	27.3878	1	1.01	0.71	1.44	60	249	105	440
rs3800319	27.3884	0.558049	1.1	0.82	1.46	142	160	222	274
rs6903160	27.4126	0.459325	1.13	0.84	1.5	127	184	190	310
rs9461366	27.4185	0.105986	1.27	0.95	1.7	143	171	190	289
rs2235232	27.4348	0.340315	1.15	0.86	1.54	185	122	283	215
rs1011665	27.4403	0.045321	1.38	1.01	1.87	208	89	317	187
rs6914864	27.4445	0.579437	1.09	0.8	1.49	93	215	146	369
rs9468076	27.4469	0.014391	1.76	1.12	2.77	298	28	490	81
rs1883403	27.4583	0.037932	1.4	1.03	1.9	208	89	316	189
rs2206250	27.4638	0.537744	1.13	0.8	1.6	251	60	425	115
rs3734574	27.4792	0.53785	1.13	0.8	1.6	251	60	426	115
rs4711152	27.4882	0.237342	1.19	0.89	1.6	187	120	273	209
rs6926142	27.5037	0.043252	1.34	1.01	1.79	169	137	245	267
rs4713101	27.5158	0.015204	1.43	1.07	1.91	148	148	208	298
rs760880	27.5162	0.018087	1.43	1.07	1.91	144	153	201	305
rs7509	27.5268	0.043009	1.35	1.02	1.79	165	140	240	275
rs1883216	27.5332	0.013249	1.44	1.09	1.92	152	151	212	304
rs7754724	27.5588	0.335159	1.18	0.86	1.62	228	79	368	150
rs4713108	27.566	0.330906	1.18	0.86	1.63	228	77	368	147
rs4713112	27.6248	0.129721	1.25	0.94	1.65	146	166	214	303
rs6456799	27.6815	0.069868	1.3	0.98	1.73	145	166	207	309
rs6936999	27.703	0.047005	1.5	1.02	2.21	290	42	465	101
rs9366694	27.7315	0.072441	1.44	0.98	2.12	289	43	466	100
rs878241	27.7669	0.420246	1.29	0.75	2.23	319	20	543	44
rs9380007	27.7685	0.203352	1.2	0.91	1.59	155	169	232	304
rs2179096	27.7739	0.035296	1.37	1.03	1.81	141	180	191	333
rs9468213	27.8142	0.020598	1.4	1.06	1.86	143	177	194	337
rs4713120	27.8298	0.153346	1.23	0.93	1.62	148	170	220	310
rs9468220	27.841	0.000481	1.74	1.28	2.36	112	201	126	393
rs2893931	27.856	0.004658	1.59	1.16	2.17	105	196	124	367
rs200484	27.8837	5.9e-05	1.99	1.42	2.78	90	236	86	449
rs200994	27.9218	0.000143	1.82	1.34	2.48	115	201	123	392
rs200956	27.9477	7.6e-05	1.91	1.39	2.62	104	207	108	410
rs731132	27.9933	0.076593	1.33	0.98	1.81	221	88	335	178
rs2130357	27.9948	0.207963	1.27	0.88	1.82	272	52	457	111
rs9468256	28.0035	0.041034	1.66	1.02	2.67	311	25	511	68
rs276369	28.0272	0.086712	1.28	0.97	1.7	152	167	220	310
rs904142	28.0334	0.214053	1.94	0.77	4.88	333	6	572	20
rs2116984	28.0407	0.041009	1.66	1.03	2.68	312	25	512	68
rs12332927	28.0631	0.704239	1.11	0.68	1.81	28	304	45	541
rs203870	28.1498	0.510416	1.24	0.66	2.35	17	322	24	565
rs4713139	28.2007	3.1e-05	2.02	1.46	2.79	97	219	97	442
rs1150674	28.2423	1	1.01	0.53	1.94	15	321	26	564
rs1150699	28.2897	0.101635	1.45	0.95	2.2	304	35	498	83
rs1736890	28.2974	0.083326	1.46	0.96	2.22	304	35	499	84
rs1233713	28.3063	0.046639	1.33	1.01	1.76	161	158	229	299
rs9380069	28.3113	6.9e-05	1.94	1.4	2.69	96	223	98	442
rs1150711	28.3165	0.004834	1.51	1.14	2	149	167	198	335
rs2235359	28.3236	0.223402	1.3	0.86	1.96	297	38	488	81
rs12000	28.3354	0.321731	1.21	0.84	1.73	267	54	442	108
rs1679709	28.3363	6e-05	1.98	1.43	2.74	95	219	97	442
rs2179174	28.3469	0.36652	1.19	0.83	1.71	267	54	445	107
rs1150726	28.351	0.025221	1.39	1.05	1.85	155	152	222	303
rs1778477	28.3566	0.121082	1.39	0.94	2.06	291	41	480	94
rs1150724	28.3582	0.025206	1.39	1.04	1.84	154	154	218	302
rs1997660	28.3776	0.041555	1.36	1.02	1.8	143	165	205	321
rs853684	28.4025	0.039469	1.34	1.02	1.77	161	157	230	301
rs6903823	28.4303	0.020839	1.47	1.07	2.03	96	198	121	368
rs733743	28.4353	1	1.03	0.57	1.86	319	18	552	32
rs13201752	28.4391	0.012155	1.45	1.09	1.93	135	172	186	344
rs11751928	28.4434	0.276628	1.26	0.85	1.88	292	41	490	87
rs9468356	28.45	0.314663	1.25	0.84	1.88	291	40	482	83
rs2859348	28.4671	0.015709	1.41	1.07	1.87	174	141	247	283
rs6902687	28.5215	0.045397	1.35	1.01	1.81	134	168	190	322
rs2859369	28.5295	0.567466	1.23	0.69	2.2	321	18	550	38
rs2859374	28.5361	0.432934	1.23	0.78	1.92	303	31	518	65
rs12663002	28.5496	0.643314	1.14	0.72	1.81	304	30	523	59
rs974334	28.5822	0.102022	1.44	0.94	2.19	297	35	496	84
rs2078035	28.596	0.172825	1.47	0.88	2.45	310	22	529	55
rs2064424	28.6039	0.211623	1.41	0.84	2.36	310	22	531	53
rs440481	28.6072	0.244731	1.32	0.86	2.02	296	34	503	76
rs392230	28.6126	0.366065	1.19	0.83	1.71	272	53	465	108
rs393414	28.6293	1	1.03	0.64	1.66	302	29	525	52
rs9501180	28.6874	0.2706	1.19	0.89	1.58	171	126	270	236
rs4713175	28.7436	0.905803	1.05	0.66	1.67	310	30	533	54
rs7382146	28.7733	0.114561	1.26	0.95	1.67	170	139	256	263
rs6939576	28.7773	0.42256	1.13	0.85	1.5	125	194	196	343
rs6905871	28.784	0.099406	1.65	0.92	2.97	322	16	549	45
rs1539584	28.7879	0.920142	1.04	0.7	1.53	46	272	80	490
rs9468413	28.7977	0.00085	1.77	1.27	2.46	92	216	99	411
rs2893973	28.8051	0.762937	1.08	0.72	1.61	280	43	489	81
rs2893970	28.8113	0.916322	1.04	0.69	1.57	263	40	462	73
rs1233578	28.8202	0.000166	1.86	1.35	2.57	97	219	105	442
rs1233585	28.8243	0.004199	1.58	1.16	2.15	104	214	130	423
rs1233597	28.8363	0.013241	1.46	1.09	1.95	123	192	165	376
rs1233627	28.8597	0.04824	1.35	1.01	1.81	192	111	298	233
rs7766699	28.8762	1.1e-05	2.14	1.53	2.99	90	232	85	469
rs7767099	28.8767	3e-06	2.29	1.62	3.24	87	229	77	465
rs2765220	28.8776	0.002046	1.68	1.22	2.31	96	207	112	405
rs209177	28.9111	0.80293	1.06	0.76	1.47	241	72	421	133
rs7763661	28.9514	0.099451	1.6	0.94	2.72	313	20	519	53
rs1536215	28.9759	0.25564	1.38	0.82	2.31	316	22	532	51
rs2894066	29.0019	0.005665	1.51	1.13	2.01	165	132	235	283
rs6912843	29.0121	0.332812	1.18	0.86	1.63	238	75	400	149
rs3131067	29.013	0.00148	1.59	1.19	2.11	171	131	235	286
rs2071789	29.0201	0.360609	1.22	0.82	1.8	49	267	73	485
rs9257403	29.025	0.806358	1.05	0.76	1.44	234	76	412	140
rs2157312	29.0352	0.005206	1.53	1.14	2.05	204	101	303	229
rs9257425	29.0445	0.411315	1.15	0.83	1.6	238	72	402	140
rs3135322	29.0549	0.121315	1.27	0.95	1.7	193	110	302	219
rs3129791	29.0623	1e-05	2.15	1.54	3.02	89	228	85	469
rs6456880	29.0712	0.05073	1.35	1	1.83	212	94	333	200
rs7755402	29.11	0.841578	1.05	0.71	1.56	287	44	501	81
rs7341218	29.1201	0.921465	1.04	0.7	1.53	288	46	502	83
rs4713199	29.1255	0.141146	1.54	0.88	2.7	320	18	531	46
rs2179648	29.1445	0.017383	1.45	1.07	1.98	217	85	330	188
rs999265	29.1498	1	1.02	0.69	1.51	290	45	506	80
rs12665108	29.1702	1	1.02	0.69	1.51	290	45	506	80
rs3749977	29.1883	0.001129	1.83	1.26	2.66	275	45	430	129
rs3129107	29.1896	1	1.01	0.68	1.5	289	45	502	79
rs2064162	29.1968	0.013786	1.46	1.08	1.97	219	91	341	207
rs3129119	29.2108	0.07052	1.32	0.98	1.77	118	197	165	363
rs3129125	29.2294	0.018256	1.41	1.07	1.87	179	131	262	271
rs2394520	29.2452	0.467508	1.16	0.81	1.67	255	54	439	108
rs3116817	29.2575	0.02659	1.38	1.04	1.83	180	130	266	265
rs3129171	29.2637	0.001079	1.66	1.23	2.24	114	202	136	399
rs3116830	29.2756	1e-05	2.15	1.54	3.02	89	229	85	471
rs3129093	29.2782	0.002521	1.61	1.19	2.19	106	203	131	404
rs2394547	29.2903	0.751837	1.08	0.72	1.63	42	296	68	519
rs3116837	29.2926	0.291765	1.22	0.86	1.74	261	57	442	118
rs2207337	29.3082	0.009379	1.46	1.1	1.93	151	161	206	320
rs12182511	29.3307	0.169213	1.23	0.92	1.64	191	119	304	233
rs3117330	29.3338	0.00763	1.48	1.11	1.96	153	159	209	321
rs3130827	29.3387	0.009643	1.47	1.1	1.96	141	156	195	317
rs1884123	29.3644	0.006664	1.48	1.12	1.95	160	156	218	314
rs4446587	29.3676	0.124725	1.26	0.94	1.68	196	110	317	224
rs3117425	29.3684	1.4e-05	2.09	1.5	2.91	92	225	91	466
rs1884294	29.3709	0.352437	1.34	0.78	2.31	311	20	533	46
rs7383161	29.3726	0.044598	1.35	1.02	1.79	167	141	247	281
rs6899932	29.3741	0.127428	1.52	0.89	2.59	311	20	532	52
rs9257691	29.3769	0.168722	1.23	0.92	1.63	193	117	309	230
rs4594993	29.3785	0.204147	1.44	0.85	2.44	311	21	533	52
rs3117426	29.38	0.000663	1.71	1.26	2.32	110	203	130	411
rs9257693	29.3823	0.309	1.16	0.87	1.55	187	119	307	227
rs9257694	29.3825	0.151133	1.24	0.93	1.64	188	124	297	242
rs9257696	29.3835	0.818932	1.08	0.69	1.7	303	32	516	59
rs10456370	29.3887	0.0277	1.39	1.04	1.86	206	104	312	219
rs720831	29.3925	0.04369	1.35	1.02	1.79	153	155	224	306
rs12660111	29.4041	0.917222	1.03	0.69	1.55	42	279	73	499
rs9257744	29.4143	0.032185	1.39	1.03	1.87	114	186	164	372
rs6930033	29.4319	0.917802	1.04	0.69	1.55	43	281	74	502
rs4713211	29.444	0.025611	1.39	1.05	1.84	153	158	217	311
rs7772982	29.449	0.225041	1.3	0.86	1.95	284	38	484	84
rs3749971	29.4508	1e-06	2.28	1.64	3.17	96	224	88	468
rs9257802	29.4513	1e-06	2.17	1.6	2.95	118	191	118	415
rs238872	29.4599	0.02574	1.39	1.04	1.84	188	122	278	250
rs3129681	29.4624	0.01424	1.44	1.08	1.92	186	122	271	256
rs1419638	29.4635	0.003326	1.63	1.18	2.25	253	66	398	169
rs9257824	29.4705	0.000311	1.77	1.3	2.42	230	77	327	194
rs9257834	29.4726	0.000681	1.73	1.26	2.37	233	77	327	187
rs2073151	29.4729	0.000242	1.79	1.31	2.45	233	77	331	196
rs10807055	29.4921	0.069876	1.39	0.98	1.98	268	56	433	126
rs6456947	29.4963	0.014731	1.51	1.09	2.11	247	65	389	155
rs2523421	29.4984	0.895173	1.05	0.63	1.76	25	306	42	540
rs7754054	29.5005	0.069538	1.39	0.98	1.97	268	56	430	125
rs3131025	29.5068	0.018001	1.5	1.08	2.09	247	65	387	153
rs9257858	29.5082	0.338852	1.23	0.84	1.8	282	46	464	93
rs2074469	29.5159	0.246634	1.28	0.87	1.89	282	44	461	92
rs2074466	29.5163	0.057667	1.59	1	2.54	299	27	487	70
rs2074464	29.5165	0.003637	1.6	1.16	2.2	219	76	322	179
rs1535039	29.5194	1.3e-07	2.44	1.75	3.4	99	217	86	460
rs9257863	29.5336	0.060934	1.58	1	2.5	298	28	485	72
rs1233495	29.5521	0.000997	1.63	1.22	2.19	134	174	165	350
rs3094573	29.5546	0.010218	1.52	1.11	2.08	229	78	346	179
rs17415601	29.5604	0.045769	2.01	1.01	3.99	331	11	554	37
rs1233493	29.5662	2.6e-07	2.39	1.72	3.32	101	217	89	457
rs3128844	29.5672	0.014687	1.49	1.09	2.05	229	76	347	172
rs1233490	29.5699	0.866642	1.03	0.74	1.44	74	247	122	421
rs1233489	29.571	1.3e-07	2.46	1.77	3.42	100	218	86	461
rs1233487	29.5768	0.00085	1.66	1.24	2.24	132	170	160	343
rs3130858	29.5815	0.382376	1.64	0.64	4.21	335	6	578	17
rs3131020	29.5839	3e-06	2.02	1.5	2.71	202	100	257	257
rs1557820	29.5852	1.1e-05	1.94	1.44	2.61	202	97	270	251
rs1233478	29.5858	1.1e-06	2.2	1.6	2.9	119	184	120	402
rs3094572	29.589	0.004161	1.61	1.17	2.23	244	69	364	166
rs3094564	29.5943	0.00261	1.68	1.2	2.34	243	64	358	158
rs724078	29.597	0.12974	1.28	0.93	1.77	227	77	365	159
rs909967	29.6075	0.048419	1.34	1.01	1.79	176	127	251	243
rs2534795	29.6193	0.736968	1.06	0.76	1.48	251	70	422	125
rs3094576	29.6242	0.293452	1.31	0.81	2.1	305	27	519	60
rs453658	29.6278	0.012046	1.46	1.09	1.95	177	121	241	240
rs389419	29.6294	1.8e-08	2.56	1.85	3.55	105	212	89	460
rs8337	29.6317	0.080044	1.42	0.97	2.06	280	46	464	108
rs2076485	29.6319	0.554963	1.12	0.8	1.56	253	68	419	126
rs362536	29.6349	0.019353	1.41	1.06	1.89	186	119	261	236
rs388234	29.6413	0.081307	1.33	0.97	1.83	228	79	349	161
rs1119080	29.6447	0.051872	1.36	1	1.86	229	82	350	171
rs1003581	29.6482	0.144491	1.38	0.9	2.11	303	34	504	78
rs1233397	29.6537	0.035597	1.5	1.03	2.18	273	46	440	111
rs1233388	29.6617	0.047151	1.48	1	2.19	276	42	452	102
rs1233387	29.6638	0.048093	1.43	1.01	2.03	254	57	405	130
rs3025643	29.6779	0.144128	1.3	0.92	1.83	266	59	428	123
rs10946999	29.6796	0.061236	1.66	0.98	2.83	313	20	517	55
rs29230	29.6844	0.056675	1.5	0.99	2.27	295	36	476	87
rs29225	29.689	0.529321	1.21	0.73	2.01	313	24	537	50
rs29232	29.7194	0.000438	1.75	1.28	2.39	244	77	342	189
rs29228	29.7317	0.001219	1.65	1.23	2.23	122	179	151	366
rs3130250	29.733	0.730042	1.08	0.69	1.69	34	301	55	525
rs2535260	29.7369	0.027234	1.55	1.06	2.27	292	44	466	109
rs3130253	29.742	0.619479	1.25	0.64	2.44	326	13	563	28
rs2535241	29.7488	0.341566	2.32	0.49	10.97	340	2	587	8
rs376319	29.7526	0.001107	1.65	1.23	2.21	129	174	160	356
rs396660	29.7541	0.008376	1.48	1.11	1.97	149	159	195	308
rs3131888	29.7719	0.301332	1.17	0.88	1.57	171	123	273	230
rs7776082	29.7753	0.45504	1.12	0.84	1.51	177	114	294	213
rs2394660	29.7807	0.317026	1.22	0.85	1.75	264	53	433	106
rs2517912	29.7919	0.075888	1.33	0.98	1.81	171	100	270	210
rs1736926	29.8005	0.909355	1.05	0.67	1.64	299	33	510	59
rs1736922	29.8019	0.002393	1.59	1.19	2.14	131	166	165	333
rs2394159	29.8107	0.359773	1.16	0.86	1.57	204	96	339	185
rs4713243	29.8289	0.51557	1.12	0.82	1.55	211	76	385	156
rs1737069	29.8387	0.215009	1.29	0.88	1.9	274	45	453	96
rs1737052	29.8421	0.78313	1.06	0.74	1.52	267	55	454	99
rs6921921	29.8634	0.310206	1.25	0.83	1.88	281	39	473	82
rs1736980	29.8799	0.027149	1.39	1.05	1.86	134	173	190	342
rs1633105	29.8914	0.504633	1.11	0.83	1.49	166	120	289	232
rs2394180	29.9132	0.431527	1.21	0.77	1.9	305	31	512	63
rs1611133	29.9174	0.009802	1.48	1.1	1.99	125	170	169	341
rs2523765	29.9251	0.085832	1.3	0.97	1.75	164	121	249	239
rs1611732	29.939	0.209844	1.22	0.91	1.63	172	128	254	230
rs3094165	29.9415	0.145579	1.36	0.92	2.01	251	43	409	95
rs2844821	29.9466	0.601423	1.11	0.79	1.57	241	62	423	121
rs2523809	29.9576	0.016531	1.81	1.11	2.97	315	23	521	69
rs17188589	30.4513	1e-06	2.22	1.62	3.04	109	205	106	442
rs3132627	30.4547	1e-06	2.25	1.64	3.09	108	204	104	442
rs9262143	30.7608	2.3e-07	2.31	1.69	3.17	112	197	106	431
rs8233	30.8009	2e-06	2.04	1.52	2.73	143	164	157	367
rs17195740	30.8252	4e-06	2.12	1.54	2.9	106	204	108	440
rs3129980	30.8664	1.5e-07	2.29	1.68	3.1	121	190	119	427
rs17195879	30.9046	3.5e-08	2.41	1.77	3.29	118	186	111	422
rs3095155	31.007	4.2e-08	2.41	1.76	3.3	115	181	111	421
rs1634717	31.0806	0.000758	1.67	1.24	2.26	188	103	254	233
rs2233986	31.1871	3e-06	2.01	1.5	2.7	185	113	217	267
rs17196849	31.1894	5.8e-08	2.34	1.72	3.18	122	179	121	416
rs3869109	31.2922	0.067041	1.32	0.99	1.76	169	124	263	254
rs7383336	31.2951	0.003862	1.54	1.15	2.05	142	148	201	322
rs12662501	31.2988	0.022972	1.73	1.09	2.74	305	27	510	78
rs6904669	31.3008	0.590691	1.1	0.81	1.48	203	97	338	177
rs3130473	31.3072	0.000297	1.73	1.29	2.32	139	149	179	332
rs3095245	31.3219	0.000463	1.69	1.26	2.26	203	104	281	243
rs3132486	31.3511	0.001621	1.63	1.2	2.2	230	85	336	202
rs6906846	31.3537	0.001441	1.82	1.25	2.64	282	45	431	125
rs2844535	31.4583	0.003218	1.57	1.17	2.11	138	151	180	310
rs2523454	31.4758	6e-06	2.01	1.48	2.71	167	114	195	267
rs9380254	31.4863	0.691934	1.13	0.68	1.89	26	299	41	534
rs1131896	31.4871	0.162518	1.29	0.91	1.84	257	57	422	121
rs2516470	31.5153	0.000178	1.97	1.38	2.83	277	48	415	142
rs2516425	31.5542	4.6e-05	1.86	1.38	2.51	202	96	272	241
rs2734574	31.6019	0.001695	1.59	1.19	2.12	175	127	229	264
rs909253	31.6483	0.004722	1.54	1.15	2.06	159	133	210	270
rs1041981	31.6488	0.003251	1.55	1.16	2.07	161	136	212	277
rs1800750	31.6509	0.016103	2.8	1.2	6.54	14	326	9	587
rs1800629	31.651	0.000112	1.89	1.37	2.61	119	147	124	290
rs361525	31.6511	0.727313	1.12	0.57	2.22	14	324	22	571
rs9267531	31.7447	1e-06	2.2	1.61	3.01	116	179	113	384
rs3117573	31.8264	1e-06	2.22	1.63	3.03	118	180	118	400
rs17207874	32.0489	3.4e-07	2.26	1.65	3.08	117	180	116	403
rs3135338	32.5092	8.5e-14	7.13	3.77	13.45	324	11	463	112
rs3135335	32.5098	1.7e-14	7.47	3.96	14.08	323	11	460	117
rs3135395	32.5132	1.5e-15	8.37	4.32	16.22	323	10	459	119
rs2395178	32.5133	5.8e-15	7.59	4.03	14.31	322	11	459	119
rs3129869	32.5136	1.9e-15	8.94	4.47	17.88	321	9	455	114
rs3129871	32.5143	1.9e-15	7.41	4.03	13.63	320	12	450	125
rs3134996	32.7448	3e-06	2.1	1.54	2.86	122	167	129	371
rs11759565	32.8259	7.7e-16	4.01	2.79	5.77	274	43	340	214
rs1023448	32.8362	6.1e-14	3.49	2.48	4.92	249	53	300	223
rs9277554	33.1635	0.00069	1.67	1.25	2.24	132	172	163	355
rs3128917	33.168	3.9e-05	1.87	1.39	2.51	129	184	145	386
rs3117223	33.168	5.5e-05	1.84	1.37	2.48	129	185	146	386
rs2064478	33.1802	2.8e-05	1.91	1.42	2.58	122	200	131	411
rs3130215	33.1829	0.940994	1.02	0.77	1.37	203	112	342	193
rs3130216	33.1852	0.715706	1.06	0.8	1.42	193	120	322	213
rs3762013	33.2505	0.094566	1.29	0.97	1.71	154	145	235	285
rs2229634	33.7462	0.04544	1.37	1.02	1.84	110	208	150	388
