# Supplementary material for: Analysis of Single Nucleotide Polymorphisms Identifies Major Type 1A Diabetes Locus Telomeric of the Major Histocompatibility Complex
Source: Oxford University Press journal article supplement (doi:10.2337/db07-0900), 2007-12-08
Supplement: db070900onlineonlytable3.xls [file db070900onlineonlytable3.xls]

## Sheet: Sheet1
HLA-DR Type (Raw)	HLA-DR (simple grouping)	Number of chromosomes in group
1	1	180
0101	1	211
0102	1	21
0103	1	29
3	3	440
0301	3	749
4	4	9
0401	4	1010
0402	4	75
0403	4	25
0404	4	272
0405	4	81
0407	4	17
0408	4	11
0409	4	2
0413	4	1
7	7	120
0701	7	209
8	8	34
0801	8	69
0802	8	1
0803	8	3
0804	8	2
9	9	22
0901	9	42
10	10	3
1001	10	10
11	11	45
1101	11	89
1102	11	2
1103	11	11
1104	11	42
12	12	10
1201	12	34
1202	12	2
13	13	101
1301	13	69
1302	13	153
1303	13	18
1305	13	2
14	14	15
1401	14	30
1404	14	4
15	15	80
1501	15	206
1502	15	7
1503	15	1
16	16	9
1601	16	35
1602	16	4
0302	excluded	3
No DR typing		379
Certain types were excluded (column B) if they could not be entered into another group or if doing so would unknowingly group types with differential effects on T1D risk
