# Supplementary material for: Analysis of Single Nucleotide Polymorphisms Identifies Major Type 1A Diabetes Locus Telomeric of the Major Histocompatibility Complex
Source: Oxford University Press journal article supplement (doi:10.2337/db07-0900), 2007-12-08
Supplement: db070900onlineonlytable4.pdf [file db070900onlineonlytable4.pdf]

| HLA-DQB Type (Raw) | HLA-DQB (simple grouping) | Number of chromosomes in group |
|--------------------|---------------------------|--------------------------------|
| 2                  | 2                         | 543                            |
| 4                  | 4                         | 32                             |
| 5                  | 5                         | 204                            |
| 6                  | excluded                  | 1                              |
| 0201               | 2                         | 921                            |
| 0301               | 0301                      | 490                            |
| 0302               | 0302                      | 1264                           |
| 0303               | 0303                      | 136                            |
| 0304               | excluded                  | 7                              |
| 0305               | excluded                  | 2                              |
| 0402               | 4                         | 76                             |
| 0501               | 5                         | 267                            |
| 0502               | 5                         | 45                             |
| 0503               | 5                         | 33                             |
| 0504               | 5                         | 3                              |
| 0601               | 0601                      | 13                             |
| 0602               | 0602                      | 271                            |
| 0603               | 0603                      | 117                            |
| 0604               | 0604                      | 180                            |
| 0607               | excluded                  | 1                              |
| 0609               | 0609                      | 26                             |
| No DQB typing      |                           | 367                            |

**Certain types were excluded (column B) if they could not be entered into another group or if doing so would unknowingly group types with differential effects on T1D risk**
