# Supplementary material for: Analysis of Single Nucleotide Polymorphisms Identifies Major Type 1A Diabetes Locus Telomeric of the Major Histocompatibility Complex
Source: Oxford University Press journal article supplement (doi:10.2337/db07-0900), 2007-12-08
Supplement: db070900onlineonlytable5.xls [file db070900onlineonlytable5.xls]

## Sheet: Sheet1
HLA-B Type (Raw)	HLA-B (simple grouping)	Number of chromosomes in group
7	7	75
8	8	153
13	13	5
14	14	16
15	15	26
18	18	38
27	27	30
35	35	59
37	37	2
38	38	1
39	39	23
40	40	54
41	41	1
44	44	69
45	45	6
47	47	1
49	49	7
50	50	6
51	51	16
52	52	1
53	53	2
55	55	15
57	57	14
58	58	1
70	70	1
0702	7	410
0704	7	1
0705	7	13
0801	8	741
1301	13	1
1302	13	61
1401	14	27
1402	14	77
1501	15	455
1503	15	5
1507	15	2
1508	15	1
1509	15	1
1510	15	4
1515	15	1
1516	15	2
1517	15	14
1518	15	16
1524	15	4
1525	15	1
1571	15	1
1801	18	253
1812	18	1
2701	27	1
2702	27	7
2703	27	101
2705	27	35
2707	27	1
3501	35	170
3502	35	20
3503	35	34
3508	35	12
3701	37	44
3801	38	55
3901	39	43
3906	39	82
4001	40	288
4002	40	36
4006	40	3
4101	41	21
4102	41	9
4202	4202	1
4402	44	332
4403	44	149
4404	44	2
4405	44	4
4409	44	1
4501	45	14
4701	47	12
4801	4801	2
4901	49	49
5001	50	54
5002	50	2
5101	51	120
5105	51	1
5107	51	1
5108	51	4
5201	52	16
5301	53	11
5501	55	50
5601	5601	22
5701	57	88
5702	57	1
5703	57	3
5801	58	21
7301	7301	1
No B typing		362
Certain types were excluded (column B) if they could not be entered into another group or if doing so would unknowingly group types with differential effects on T1D risk
