# Supplementary material for: Analysis of Single Nucleotide Polymorphisms Identifies Major Type 1A Diabetes Locus Telomeric of the Major Histocompatibility Complex
Source: Oxford University Press journal article supplement (doi:10.2337/db07-0900), 2007-12-08
Supplement: db070900onlineonlytable6.xls [file db070900onlineonlytable6.xls]

## Sheet: Sheet1
HLA-A Type (Raw)	HLA-A (simple grouping)	Number of chromosomes in group
1	1	105
2	2	478
3	3	70
11	11	14
23	23	8
24	24	38
25	25	2
26	26	7
29	29	18
30	30	9
31	31	38
32	32	14
33	33	12
68	68	2
0101	1	750
0103	1	1
0201	2	953
0202	2	8
0205	2	49
0206	2	8
0220	2	1
0234	2	1
0235	2	1
0301	3	521
0302	3	6
1101	11	202
1105	11	1
2301	23	57
2402	24	373
2403	24	5
2501	25	66
2601	26	78
2607	26	1
2608	26	2
2901	29	11
2902	29	137
3001	30	24
3002	30	83
3003	30	1
3004	30	1
3010	30	1
3101	31	65
3201	32	109
3204	32	1
3301	33	16
3303	33	7
3402	3402	1
3601	3601	2
6601	6601	9
6602	6602	1
6801	6801	117
6802	6802	26
6901	6901	3
7401	7401	1
No A Typing		484
Certain types were excluded (column B) if they could not be entered into another group or if doing so would unknowingly group types with differential effects on T1D risk
